# Supplementary material
Source: publisher figshare collection journal article supplement (https://gsapubs.figshare.com/articles/dataset/_/12535016)
Supplement: Supplementary file 1 [file 1]

B.P. Horton et al., 2017, Response times of microfossils to rapid sea-level rise: Timing of response of two microfossil groups to a sudden tidal-flooding experiment in Cascadia: *Geology*, doi:10.1130/G38832.1.

## APPENDIX DR1 –METHODS USED IN THE STUDY

For foraminiferal and diatom analyses, two sets of surface samples of 1 cm thickness each were taken from alternating corners of a 1x1 m sampling quadrant at three stations (stations 1-3) in the Ni-les'tun salt marsh (Fig. 1 d, Table DR1) prior to tide gate removal on 15-16 August 2011. After tidal restoration, samples were taken monthly in the first 12 months, and subsequently every two and then every six months until March 2016. The samples for foraminiferal analysis were stained with Rose Bengal on the day of sampling for identification of living specimens (Walton, 1952), stored in a buffered ethanol/ water solution (50:50) in order to avoid dissolution of calcareous tests and refrigerated at 5°C. Wet sample volume from each sample was measured and samples were wet-sieved through 500  $\mu\text{m}$  and 63  $\mu\text{m}$  screens. The fraction >500  $\mu\text{m}$  was examined for larger foraminifera before being discarded. A wet-splitter (Scott and Hermelin, 1993) was used to split the fraction between 63-500  $\mu\text{m}$  into eight equal aliquots as described in Horton and Edwards (2006). Live and dead foraminiferal tests were counted wet under a binocular microscope to facilitate the detection of stained foraminifera and to prevent drying of the organic residue (de Rijk, 1995; Table DR2). Only tests with all but the last chamber clearly stained red were counted as living at the time of collection. Taxa were identified according to the taxonomic descriptions in Horton and Edwards (2006), Hawkes et al. (2010), and Wright et al. (2011). Foraminifera were classified into two subenvironments: tidal flat/ low marsh taxa and middle/ high marsh taxa following previous studies in Oregon (Hawkes et al., 2010; Engelhart et al., 2013; Milker et al., 2015a; Table DR2).

22 A total of 60 diatom slides were prepared from Stations 1, 2, and 3 using the following  
23 method:

- 24 (1) ~1 g of sediment was subsampled and oxidized with hydrogen peroxide to remove organic  
25 material. Samples were gently heated in a water bath to accelerate the oxidation;
- 26 (2) Samples were rinsed three times in a centrifuge with distilled water;
- 27 (3) A known volume of digested sample (between 25 and 100 ml depending on the diatom  
28 concentration) was pipetted and distributed evenly on a cover slip;
- 29 (4) The cover slip was dried overnight and then inverted and mounted on a glass slide using  
30 Naphrax.

31 Diatoms were identified to species level using a Leica light microscope under oil immersion  
32 at 1000x magnification with reference to Krammer et al. (1986), Krammer and Lange-  
33 Bertalot (1988, 1991a,b) and Witkowski et al. (2000) and digital reference collections held by  
34 The University of Colorado (2010, 2012) and The Academy of Natural Sciences of Drexel  
35 University (2012) (Table DR3). When possible, 400 diatoms were identified and counted in  
36 slides with each species expressed as a percentage of total diatom valves counted. Fragments  
37 containing more than half a valve were included in the count. Using the known  
38 volume/weight of sample used in making the diatom slides, the area of slide counted, and the  
39 number of valves observed in that area, the concentration of diatom valves per gram was  
40 calculated for each sample (Table DR3).

41 Only species that exceeded 4% of total valves counted were used for paleoecological  
42 interpretation. *Paralia sulcata*, a tychoplanktonic diatom that may form prominent  
43 allochthonous assemblages, was excluded from ecological interpretations (Hemphill-Haley,  
44 1995a).

45 Diatom species were classified into three marsh subenvironments (freshwater/high marsh, low  
46 marsh, and tidal flat/subtidal channel) following previous studies in Oregon and Washington  
47 (Atwater and Hemphill-Haley 1997; Hemphill-Haley, 1993, 1995a, b, 1996; Sherrod, 1999;  
48 Sherrod et al. 2000; Sherrod, 2001; Witter et al., 2009; Sawai et al., 2016), and when  
49 necessary global catalogs (Denys, 1991; Hartley et al., 1996; Krammer et al., 1986, Krammer  
50 and Lange-Bertalot 1988, 1991a,b; Vos and de Wolf, 1988, 1993; Witkowski et al., 2000;  
51 Table DR4). The freshwater/high marsh group includes fresh and fresh-brackish diatoms that  
52 generally occur in salt concentrations less than 0.2 ‰. The low marsh diatom group includes  
53 brackish and brackish-marine species that tolerate salt concentrations between 0.2 and 30 psu.  
54 The intertidal flat/subtidal channel diatom group includes marine-brackish and marine species  
55 that thrive in salinities exceeding 30 ‰.

56 Diatoms were also classified by life-form (planktonic, epipellic, epiphytic, aerophilic). Diatom  
57 taxa that live attached to plants are defined as epiphytic forms; taxa that live on wet sediments  
58 are defined as epipellic forms; taxa that live on wet sediments but are able to survive  
59 temporarily dry conditions are defined as aerophilic forms (Table DR5). Tychoplanktonic  
60 diatoms include an array of species that live in the benthos, but are commonly found in the  
61 plankton. Diatoms that float in the water column and do not live attached to any substrate are  
62 defined as planktonic forms (Vos and de Wolf, 1988, 1993).

63 Samples for grain-size measurements were taken prior to restoration and monthly for the first  
64 12 months (Fig. 2e). The surface samples were treated with hydrogen peroxide (20%) prior to  
65 analysis to oxidize organic matter. Grain-size distribution was determined with a Laser  
66 Diffraction Particle Size Analyzer. Particle size data are reported as differential volume (i.e.,  
67 the percentage of total volume that each size class occupies) based on the Wentworth Phi  
68 Scale (Wentworth, 1922).

69 Station elevations were determined relative to the average elevation of an adjacent vegetation  
70 transect that were measured with Real-time Kinematic (RTK) GPS/GNSS and total station  
71 equipment (Brophy and van de Wetering, 2012). Elevations (Error =  $\pm 2$  cm) were referenced  
72 to the North American vertical datum (NAVD88) and mean tide level (MTL) (Table DR1).  
73 Measurements were taken at the beginning of the study (i.e., pre-restoration).

74 Pre- and post-restoration maximum tidal heights (Fig. 1a) were processed from water level  
75 data recorded at 15 minute intervals by tide gauges installed in lower Fahys Creek (Lower  
76 Fahys TG2), in the Coquille River (Coquille River TG2), and outside the restoration site in  
77 2011 and 2012 (Fig. DR2). All water levels were referenced to NAVD88 and MTL. Pre- and  
78 post-restoration salinity data were recorded at 30 minute intervals by salinity loggers installed  
79 in Fahys Creek, in the Coquille River (i, ii, and ii on Fig. 1c), and outside the restoration site  
80 in 2011 and 2013 (Table DR1; Figs. 2b, DR1).

81 Post-restoration sedimentation rates were calculated from one 19-cm-long core (10 cm in  
82 diameter) recovered in March 2016 at Station 1. Sedimentation was 1.5 cm g/cm<sup>2</sup> from  
83 August 2011 until March 2016 (56 months) (Table DR1).

84

## 85 **APPENDIX DR2 – LIVE AND DEAD FORAMINIFERAL DISTRIBUTION AT THE** 86 **CONTROL SITE**

87 In order to study the live and dead foraminiferal distribution at the control site (Bandon salt  
88 marsh), surface samples (0-1 cm depth) were taken July and October 2011 and in August and  
89 October 2012 (Milker et al., 2015b). Sample storage, preparation and foraminiferal  
90 investigations followed the methods described in Appendix DR1.

91 During the sampling period, on average between 384 and 599 live individuals (per 10 cm<sup>3</sup>  
92 sediment volume) at the tidal flat stations (St. 1-2), between 50 and 741 individuals at the low  
93 marsh stations (St. 3-4), between 144 and 424 individuals at the high marsh stations (St. 5-9),  
94 and 30 individuals at the station in the highest marsh to upland transition (St. 10) were  
95 observed (Fig. DR2A). The live populations, averaged over the sampling period, were  
96 dominated by *Miliammina fusca* (76-99%) and *Haynesina* sp. (0-21%) in the tidal flat and low  
97 marsh (St. 1-4). The high marsh (St. 5-9) was dominated by *Jadammina macrescens* (6-43%),  
98 *Trochammina inflata* (0-34%), *M. fusca* (9-25%) and *Haplophragmoides* spp. (1-21%) and  
99 the highest marsh to upland transition (St. 10) by *Trochammina irregularis* (55%) and  
100 *Balticammina pseudomacrescens* (34%).

101 In the dead assemblages had higher total numbers compared to the live populations. At the  
102 tidal flat stations (St. 1-2) between 1144 and 1166 individuals (per 10 cm<sup>3</sup>), at the low marsh  
103 stations (St. 3-4) between 635 and 1474 individuals, at the high marsh stations (St. 5-9)  
104 between 388 and 1879 individuals and in the highest marsh to upland transition (St. 10) 251  
105 individuals, averaged over the sampling period, were observed (Fig. DR2B). The dead  
106 assemblages were generally dominated by the same species such as in the live populations.  
107 The tidal flat and low marsh (St. 1-4), averaged over the sampling period, was dominated by  
108 *M. fusca* (91-99%) while *Haynesina* sp. has a lower relative abundance with 0-2%.  
109 *Jadammina macrescens* (21-64%), *T. inflata* (1-28%), *M. fusca* (6-26%) and  
110 *Haplophragmoides* spp. (1-18%) dominated in the high marsh (St. 5-9), and *T. irregularis*  
111 (62%) and *B. pseudomacrescens* (27%) the highest marsh to upland transition (St. 10).

112 The live and dead foraminiferal distribution in the naturally developed Bandon marsh is  
113 comparable to other estuarine salt marshes where a vertical benthic foraminiferal distribution  
114 with respect to elevation is observed (e.g., Kemp et al., 2009; Hawkes et al., 2010; Engelhart

et al., 2013). A comparison of the foraminiferal distributions at the control and restoration sites suggest that tidal restoration resulted in a long-term change from a high marsh to a tidal flat-low marsh environment, dominated by *M. fusca*, at St. 1 and the development of a middle-high marsh environment, dominated by *Haplophragmoides manilaensis*, *T. inflata* and *T. irregularis*, at St. 3 in the Ni-les'tun salt marsh. At St. 2, the assemblages suggest a tidal flat-low marsh environment during the first three years after tidal restoration, but then a change to a middle-high marsh assemblage occurred until September 2016 (own observations).

### **APPENDIX DR3 – LIVE FORAMINIFERAL DISTRIBUTION AT THE RESTORATION SITE**

The live foraminiferal distribution is similar to the dead assemblages observed at the restoration site (Figs. 3a; DR3; Table DR2). At Station 1, there was a standing crop of 34 live specimens (per 10 cm<sup>3</sup> sediment volume) prior to restoration. The assemblage was characterized by middle and high-marsh species (e.g., *J. macrescens*, *B. pseudomacrescens* and *T. irregularis*). Standing crops increased although remained low at  $66 \pm 52$  for 10 months after restoration. In June 2012, then months after restoration, standing crops increased to 800 per 10 cm<sup>3</sup>. From June 2012 to March 2016, the post-restoration live assemblage was dominated (74-100%) by the low-marsh species *M. fusca*. At Station 2, the first notable numbers of living foraminifera appeared 16 months (December 2012) after restoration with a standing crop of 248 per 10 cm<sup>3</sup>. *Miliammina fusca* was the dominant species with a relative abundance of 67–100% between 2012 and 2014. By March 2015 the abundance of *M. fusca* decreased and middle to high-marsh species such as *H. manilaensis* and *H. wilberti* firstly appeared. At Station 3, notable numbers of living foraminifera (standing crop of 272 per 10

cm<sup>3</sup>) first appeared in September 2013, 25 months after restoration. Diverse, middle to high-marsh species such as *H. manilaensis* and *T. irregularis* dominated the assemblage since then.

## DATA REPOSITORY REFERENCES

Atwater B.F., and Hemphill-Haley E., 1997, Recurrence intervals for great earthquakes of the past 3,500 years at northeastern Willapa Bay, Washington: U.S. Geological Survey Professional Paper, v. 1576, 108 p.

Brophy, L. S., and van de Wetering, S., 2012, Ni-les'tun Tidal Wetland Restoration Effectiveness Monitoring: Baseline (2010-2011): Green Point Consulting, the Institute for Applied Ecology, and the Confederated Tribes of Siletz Indians, 114 p.

de Rijk, S., 1995, Salinity control on the distribution of salt marsh foraminifera (Great Marshes, Massachusetts): The Journal of Foraminiferal Research, v. 25, p. 156–166, doi: 10.2113/gsjfr.25.2.156.

Denys, L., 1991, A Check-list of the diatoms in the Holocene deposits of the western Belgian coastal plain with a survey of their apparent ecological requirements. Ministère des affaires économiques, Service Géologique de Belgique.

Engelhart, S. E., Horton, B. P., Vane, C. H., Nelson, A. R., Witter, R. C., Brody, S. R., and Hawkes, A. D., 2013, Modern foraminifera,  $\delta^{13}\text{C}$ , and bulk geochemistry of central Oregon tidal marshes and their application in paleoseismology: Palaeogeography, Palaeoclimatology, Palaeoecology, v. 377, p. 13–27, doi: 10.1016/j.palaeo.2013.02.032.

Hartley, B., Ross, R., and Williams, D. M., 1996, A check-list of the freshwater, brackish and marine diatoms of the British Isles and adjoining coastal waters: Journal of the Marine

161 Biological Association United Kingdom, v. 66, p. 531–610, doi:  
 162 10.1017/S0025315400042235.

163 Hawkes, A. D., Horton, B. P., Nelson, A. R., and Hill, D. F., 2010, The application of  
 164 intertidal foraminifera to reconstruct coastal subsidence during the giant Cascadia earthquake  
 165 of AD 1700 in Oregon, USA: *Quaternary International*, v. 122, p. 116–140, doi:  
 166 10.1016/j.quaint.2009.09.019.

167 Hemphill-Haley, E., 1993, Taxonomy of recent and fossil (Holocene) diatoms  
 168 (Bacillariophyta) from northern Willapa Bay, Washington: US Geological Survey Open-File  
 169 Report 93–289, 151 p.

170 Hemphill-Haley, E., 1995a, Diatom evidence for earthquake-induced subsidence and tsunami  
 171 300 years ago in southern coastal Washington: *Geological Society of America Bulletin*, v.  
 172 107, p. 367–378, doi: 10.1130/0016-7606.

173 Hemphill-Haley, E., 1995b, Intertidal diatoms from Willapa Bay, Washington: applications to  
 174 studies of small-scale sea-level changes: *Northwest Science*, v. 69, p. 29–45.

175 Hemphill-Haley, E., 1996, Diatoms as an aid in identifying late Holocene tsunami deposits:  
 176 *The Holocene*, v. 6, p. 439–448, doi: 10.1177/095968369600600406.

177 Horton, B. P., and Edwards, R. J., 2006, Quantifying Holocene sea-level change using  
 178 intertidal foraminifera: Lessons from the British Isles: Cushman Foundation for Foraminiferal  
 179 Research, Special publication No. 40, p. 1–97.

180 Kemp, A. C., Horton, B. P., and Culver, S. J., 2009, Distribution of modern salt-marsh  
 181 foraminifera in the Albemarle–Pamlico estuarine system of North Carolina, USA:  
 182 Implications for sea-level research: *Marine Micropalaeontology*, v. 72, p. 222–238, doi:  
 183 10.1016/j.marmicro.2009.06.002.



184 Krammer, K., Lange-Bertalot, H., and Heynig, H., 1986, Bacillariophyceae 2/1. Naviculaceae,  
 185 *in* Ettl, H., Gerloff, J., Mollenhauser, eds., Süßwasserflora von Mitteleuropa. Gustav Fischer  
 186 Verlag, Stuttgart, p. 1–876.

187 Krammer, K., and Lange-Bertalot, H., 1988, Bacillariophyceae 2/2. Basillariaceae,  
 188 Epithemiaceae, Surirellaceae, *in* Ettl, H., Gerloff, J., Heynig, H., Mollenhauser, eds.,  
 189 Süßwasserflora von Mitteleuropa. Gustav Fischer Verlag, Stuttgart, p. 1–600.

190 Krammer, K., and Lange-Bertalot, H., 1991a, Bacillariophyceae 2/3. Centrales, Fragilariaceae,  
 191 Eunotiaceae, *in* Ettl, H., Gerloff, J., Heynig, H., Mollenhauser, eds., Süßwasserflora von  
 192 Mitteleuropa. Gustav Fischer Verlag, Stuttgart, p. 1–600.

193 Krammer, K., and Lange-Bertalot, H., 1991b, Bacillariophyceae 2/4. Achnanthaceae, Kritische  
 194 Ergänzungen zu Navicula (Lineolatae) und Gomphonema, *in* Ettl, H., ed., Pascher's  
 195 Süßwasserflora von Mitteleuropa, vol. 2, part 4. Gustav Fischer Verlag, Stuttgart, p. 1–437.

196 Milker, Y., Horton, B. P., Nelson, A. R., Engelhart, S. E., and Witter, R. C., 2015a,  
 197 Variability of intertidal foraminiferal assemblages in a salt marsh, Oregon, USA: Marine  
 198 Micropaleontology, v. 118, p. 1–16, doi: <http://dx.doi.org/10.1016/j.marmicro.2015.04.004>.

199 Milker, Y., Horton, B. P., Vane, C. H., Engelhart, S. E., Nelson, A. R., Witter, R. C., Khan,  
 200 N. S., and Bridgeland, W. T., 2015b, Annual and seasonal distribution of intertidal  
 201 foraminifera and stable carbon isotope geochemistry, Bandon Marsh, Oregon, USA: The  
 202 Journal of Foraminiferal Research, v. 45, p. 146–155, doi: 10.2113/gsjfr.45.2.146.

203 Sawai, Y., Horton, B. P., Kemp, A. C., Hawkes, A. D., Nagumo, T., and Nelson, A. R., 2016,  
 204 Relationships between diatoms and tidal environments in Oregon and Washington, USA:  
 205 Diatom Research, v. 31, p.17–38, doi: 10.1080/0269249X.2015.1126359.

206 Scott, D. B., and Hermelin, J. O. R., 1993, A device for precision splitting of  
 207 micropaleontological samples in liquid suspension: *Journal of Paleontology*, v. 67, p. 151–  
 208 154, doi: 10.1017/S0022336000021302.

209 Sherrod, B. L., 1999, Gradient analysis of diatom assemblages in a Puget Sound salt marsh:  
 210 can such assemblages be used for quantitative paleoecological reconstruction?  
 211 *Palaeogeography, Palaeoclimatology, Palaeoecology*, v. 149, p. 213–226, doi:  
 212 10.1016/S0031-0182(98)00202-8.

213 Sherrod, B. L., 2001, Evidence for earthquake-induced subsidence about 1100 yr ago in  
 214 coastal marshes of southern Puget Sound, Washington: *Geological Society of America*  
 215 *Bulletin*, v. 113, p. 1299–1311, doi: 10.1130/0016-7606.

216 Sherrod, B. L., Bucknam, R. C., Leopold, E. B., 2000, Holocene relative sea level changes  
 217 along the Seattle Fault at Restoration Point, Washington: *Quaternary Research*, v. 54, p. 384–  
 218 393, doi: 10.1006/qres.2000.2180.

219 The Academy Of Natural Sciences Of Drexell University, 2012, ANSP Algae Image  
 220 Database from the Phycology Section, Patrick Center for Environmental Research, The  
 221 Academy of Natural Sciences. Accessed at: <http://diatom.acnatsci.org/AlgaeImage/>

222 The University Of Colorado, 2010. Diatoms of the Unites States. Accessed at:  
 223 <http://westerndiatoms.colorado.edu/>

224 Vos, P.C., and de Wolf, H., 1988, Methodological aspects of paleo-ecological diatom research  
 225 in coastal areas of the Netherlands: *Geology Mijnbouw*, v. 67, p. 31–40.

226 Vos, P.C., and de Wolf, H., 1993, Diatoms as a tool for reconstruction sedimentary  
 227 environments in coastal wetlands: methodological aspects: *Hydrobiologia*, v. 269/270, p.  
 228 285–296, doi: 10.1007/978-94-017-3622-0\_30.

229 Walton, W. R., 1952, Techniques for recognition of living foraminifera: Contributions of the  
 230 Cushman Foundation for Foraminiferal Research, v. 3, p. 56–60.

231 Wentworth, C. K., 1922, A scale of grade and class terms for clastic sediments: The Journal  
 232 of Geology, v. 30, p. 377–392.

233 Witkowski, A., Lange-Bertalot, H., and Metzeltin, D., 2000, Diatom flora of marine coasts, *in*  
 234 Lange-Bertalot H., ed., Iconographia Diatomologica. Annotated Diatom Micrographs,  
 235 Diversity-Taxonomy-Identification, vol. 7, Ruggell, A.R.G. Gantner, 925 p.

236 Witter, R.C., Hemphill-Haley, E., Hart, R., and Gay, L., 2009, Tracking prehistoric Cascadia  
 237 tsunami deposits at Nestucca Bay, Oregon: U.S. Geological Survey, National Earthquake  
 238 Hazards Reduction Program Final Technical Report 08HQGR0076 92, 34 p.

239 Wright, A. J., Edwards, R. J., and van de Plassche, O., 2011, Reassessing transfer-function  
 240 performance in sea-level reconstruction based on benthic salt-marsh foraminifera from the  
 241 Atlantic coast of NE North America: Marine Micropaleontology, v. 81, p. 43–62, doi:  
 242 10.1016/j.marmicro.2011.07.003.

## 243 **DATA REPOSITORY TABLES**

244 Table DR1. Location and elevation of the stations, and location and sensor elevation of the  
 245 tide gauges and salinity loggers installed at the restorations and control sites (Fig. 1c).

246 Table DR2: Raw live and dead foraminiferal counts, sample split and sample volume (in cm<sup>3</sup>)  
 247 (spreadsheet). Tidal flat-low marsh species are given in blue and middle-high marsh species  
 248 are given in green.

249 Table DR3. Raw diatom counts and diatom concentrations (spreadsheet).

250 Table DR4. Diatom results summary (spreadsheet).

251 Table DR5. List of diatom taxa and ecological classifications (spreadsheet).

## 252 **DATA REPOSITORY FIGURES**

253 Figure DR1. Pre- (2011) and post-restoration (2013) salinity in the Coquille River and in  
254 Fahys Creek (a, b; i, ii, and ii on Fig. 1c) and post-restoration (2013) water level in the  
255 Coquille River and lower Fahys Creek (c; Fig. 1c, Table DR1).

256 Figure DR2. Total live (A) and dead (B) foraminiferal numbers (per 10 cm<sup>3</sup> sediment volume;  
257 given is the mean, maximum and minimum total number for the four sampling campaigns)  
258 and relative abundance of the most abundant living foraminifera, averaged over the four  
259 sampling campaigns, at the control site.

260 Figure DR3. Total live foraminiferal numbers (per 10 cm<sup>3</sup> sediment volume) at stations 1-3  
261 during the pre- and post-restoration phases in the Ni-les'tun salt marsh. Note different scaling  
262 of the y-axes.

263

Table DR1. Location and elevation of the stations, and location and sensor elevation of the tide gauges and salinity loggers installed at the restorations and control sites (Fig. 1c).

| <b>Tide gauges (TG)</b>                  | <b>Latitude</b> | <b>Longitude</b> | <b>Sensor elevation</b>     | <b>Label in Fig. 1</b>   |                                 |
|------------------------------------------|-----------------|------------------|-----------------------------|--------------------------|---------------------------------|
| Coquille River TG2                       | 43° 8.765'N     | 124° 23.561'W    | -1.51                       | I                        |                                 |
| Lower Fahys Creek TG2                    | 43° 8.898'N     | 124° 23.366'W    | 0.30                        | II                       |                                 |
| <b>Salinity/temperature logger (no.)</b> |                 |                  |                             |                          |                                 |
| Coquille River (8234)                    | 43° 8.768'N     | 124° 23.565'W    | 0.80                        | i                        |                                 |
| Fahys Creek mouth (8239)                 | 43° 8.898'N     | 124° 23.366'W    | 0.37                        | ii                       |                                 |
| Fahys Creek mid (8230)                   | 43° 9.257'N     | 124° 23.111'W    | 0.47                        | iii                      |                                 |
|                                          |                 |                  |                             |                          |                                 |
| <b>Ni-les'tun (NM) stations</b>          |                 |                  | <b>Elevation (m NAVD88)</b> | <b>Elevation (m MTL)</b> | <b>Sediment-ation rate (cm)</b> |
| Station 1                                | 43° 8.984'N     | 124° 23.270'W    | 1.45                        | 0.33                     | 1.5                             |
| Station 2                                | 43° 9.120'N     | 124° 22.997'W    | 1.84                        | 0.72                     | 0.5                             |
| Station 3                                | 43° 9.064'N     | 124° 23.263'W    | 2.07                        | 0.95                     | 0.0                             |

Table DR2: Raw live and dead foraminiferal counts, sample split and sample volume (in cm3) (spreadsheet). Tidal flat-low marsh species are given in blue and middle-high marsh species are given in green.

| Sample ID | Date (month/day/year) | Live foraminifera       |                      |                     |                            |                                     |                                  |                              |                                      |                                  |                             |                          |                        |               |     | Dead foraminifera       |                      |                     |                           |                            |                                     |                                  |                              |                                      |                                  |                             |                          |                        |               |      |       |                                      |
|-----------|-----------------------|-------------------------|----------------------|---------------------|----------------------------|-------------------------------------|----------------------------------|------------------------------|--------------------------------------|----------------------------------|-----------------------------|--------------------------|------------------------|---------------|-----|-------------------------|----------------------|---------------------|---------------------------|----------------------------|-------------------------------------|----------------------------------|------------------------------|--------------------------------------|----------------------------------|-----------------------------|--------------------------|------------------------|---------------|------|-------|--------------------------------------|
|           |                       | <i>Miliammina fusca</i> | <i>Haynesina</i> sp. | <i>Reophax</i> spp. | <i>Trochammina inflata</i> | <i>Haplophragmoides manilaensis</i> | <i>Haplophragmoides wilberti</i> | <i>Haplophragmoides</i> spp. | <i>Balticammina pseudomacrescens</i> | <i>Trochamminita irregularis</i> | <i>Jadammina macrescens</i> | <i>Miliammina petita</i> | juvenile Trochamminids | indeterminate | Sum | <i>Miliammina fusca</i> | <i>Haynesina</i> sp. | <i>Reophax</i> spp. | <i>Ammobaculites</i> spp. | <i>Trochammina inflata</i> | <i>Haplophragmoides manilaensis</i> | <i>Haplophragmoides wilberti</i> | <i>Haplophragmoides</i> spp. | <i>Balticammina pseudomacrescens</i> | <i>Trochamminita irregularis</i> | <i>Jadammina macrescens</i> | <i>Miliammina petita</i> | juvenile Trochamminids | indeterminate | sum  | Split | Wet sample volume [cm <sup>3</sup> ] |
| 1         | 08/16/11              | 8                       |                      |                     | 4                          | 1                                   |                                  |                              | 8                                    | 6                                | 6                           |                          |                        | 4             | 37  | 123                     |                      |                     |                           | 28                         | 50                                  | 5                                | 0                            | 62                                   | 126                              | 170                         |                          | 62                     | 40            | 666  | 2/8   | 43.6                                 |
| 1         | 09/02/11              | 1                       |                      |                     |                            |                                     |                                  |                              | 2                                    | 1                                | 1                           |                          |                        |               | 5   | 177                     |                      |                     |                           | 5                          | 21                                  | 0                                | 0                            | 51                                   | 50                               | 85                          |                          | 54                     | 7             | 450  | 1/8   | 41.1                                 |
| 1         | 09/14/11              | 26                      |                      |                     |                            |                                     |                                  |                              | 19                                   | 16                               | 2                           |                          | 2                      | 2             | 67  | 102                     |                      |                     |                           | 0                          | 7                                   | 0                                | 0                            | 16                                   | 30                               | 13                          |                          | 2                      | 0             | 170  | 1/8   | 30.5                                 |
| 1         | 09/28/11              | 1                       |                      |                     |                            |                                     |                                  |                              | 9                                    | 12                               | 1                           |                          | 5                      | 4             | 32  | 129                     |                      |                     |                           | 0                          | 10                                  | 0                                | 0                            | 62                                   | 65                               | 35                          |                          | 8                      | 14            | 323  | 1/8   | 40.3                                 |
| 1         | 10/14/11              | 1                       |                      |                     |                            |                                     |                                  |                              | 8                                    | 1                                | 7                           |                          | 3                      | 1             | 21  | 102                     |                      |                     |                           | 0                          | 33                                  | 0                                | 0                            | 24                                   | 57                               | 57                          |                          | 31                     | 4             | 308  | 3/8   | 28.8                                 |
| 1         | 11/07/11              | 1                       |                      |                     |                            |                                     |                                  |                              | 4                                    | 5                                | 8                           |                          |                        | 1             | 19  | 140                     |                      |                     |                           |                            | 25                                  |                                  |                              | 16                                   | 17                               | 23                          |                          | 15                     | 2             | 238  | 4/8   | 17.5                                 |
| 1         | 12/14/11              | 54                      |                      |                     |                            | 1                                   |                                  |                              | 18                                   | 11                               | 22                          |                          | 7                      | 2             | 115 | 63                      |                      |                     |                           |                            | 12                                  |                                  |                              | 17                                   | 41                               | 35                          |                          | 6                      | 4             | 178  | 5/8   | 26.8                                 |
| 1         | 01/12/12              | 13                      |                      |                     |                            |                                     |                                  |                              | 13                                   | 18                               | 6                           |                          | 5                      | 2             | 57  | 76                      |                      |                     |                           |                            | 37                                  |                                  |                              | 26                                   | 37                               | 56                          |                          | 11                     | 1             | 244  | 5/8   | 21.5                                 |
| 1         | 02/09/12              | 14                      |                      |                     |                            | 1                                   |                                  |                              | 5                                    | 15                               | 16                          |                          | 6                      | 2             | 59  | 78                      |                      |                     |                           |                            | 26                                  | 2                                |                              | 16                                   | 61                               | 44                          |                          | 3                      | 1             | 231  | 8/8   | 17.2                                 |
| 1         | 04/11/12              | 34                      |                      |                     |                            | 1                                   |                                  |                              | 8                                    | 5                                | 2                           |                          | 1                      |               | 51  | 93                      |                      |                     |                           | 2                          | 35                                  | 1                                |                              | 68                                   | 64                               | 59                          |                          | 6                      | 8             | 336  | 2/8   | 27.8                                 |
| 1         | 05/16/12              | 37                      |                      |                     |                            | 1                                   |                                  |                              | 21                                   | 13                               | 5                           |                          | 1                      | 2             | 80  | 90                      |                      |                     |                           | 1                          | 44                                  |                                  |                              | 34                                   | 46                               | 17                          |                          | 4                      | 1             | 237  | 2/8   | 22.5                                 |
| 1         | 06/19/12              | 156                     |                      |                     |                            |                                     |                                  |                              |                                      |                                  | 1                           |                          | 1                      |               | 158 | 76                      |                      |                     |                           | 3                          |                                     |                                  |                              | 3                                    |                                  |                             |                          |                        |               | 82   | 1/8   | 15.8                                 |
| 1         | 07/24/12              | 92                      |                      |                     |                            |                                     |                                  |                              |                                      |                                  |                             |                          |                        |               | 92  | 207                     |                      |                     |                           |                            |                                     |                                  |                              | 0                                    |                                  |                             |                          |                        |               | 207  | 1/8   | 20.0                                 |
| 1         | 08/29/12              | 496                     |                      |                     |                            |                                     |                                  |                              |                                      |                                  | 3                           |                          |                        |               | 499 | 2800                    |                      |                     |                           | 1                          | 1                                   |                                  |                              | 5                                    | 7                                | 25                          |                          | 41                     |               | 2880 | 8/8   | 30.0                                 |
| 1         | 10/11/12              | 39                      |                      |                     |                            |                                     |                                  |                              |                                      |                                  |                             |                          |                        |               | 39  | 132                     |                      |                     |                           |                            | 1                                   |                                  |                              | 3                                    | 4                                | 2                           |                          | 2                      |               | 144  | 1/8   | 14.5                                 |
| 1         | 12/08/12              | 63                      |                      |                     |                            |                                     |                                  |                              |                                      | 2                                |                             |                          |                        |               | 65  | 243                     |                      |                     |                           |                            |                                     |                                  |                              | 1                                    | 5                                |                             |                          | 1                      |               | 250  | 1/8   | 14.5                                 |
| 1         | 02/27/13              | 120                     |                      |                     |                            |                                     |                                  |                              | 2                                    | 3                                |                             |                          | 1                      |               | 126 | 132                     |                      |                     |                           |                            |                                     |                                  |                              | 2                                    | 9                                | 1                           |                          | 1                      |               | 145  | 1/8   | 16.5                                 |
| 1         | 05/31/13              | 134                     |                      |                     |                            |                                     |                                  |                              |                                      | 1                                |                             |                          |                        |               | 135 | 356                     |                      |                     |                           |                            |                                     |                                  |                              |                                      | 2                                |                             |                          | 6                      |               | 364  | 1/8   | 15.0                                 |
| 1         | 09/24/13              | 44                      | 2                    |                     |                            |                                     |                                  |                              |                                      |                                  |                             |                          |                        |               | 46  | 407                     |                      |                     |                           |                            | 1                                   |                                  |                              | 4                                    | 5                                |                             |                          |                        | 0             | 417  | 2/8   | 15.7                                 |
| 1         | 03/12/14              | 189                     |                      |                     |                            |                                     |                                  |                              |                                      |                                  |                             |                          |                        |               | 189 | 93                      |                      |                     |                           |                            |                                     |                                  |                              |                                      | 0                                |                             |                          |                        |               | 93   | 1/8   | 22.2                                 |
| 1         | 09/04/14              | 52                      | 5                    |                     |                            |                                     |                                  |                              |                                      | 1                                |                             |                          |                        |               | 58  | 305                     | 1                    |                     |                           | 2                          |                                     | 1                                |                              | 4                                    | 0                                | 1                           |                          |                        |               | 314  | 1/8   | 27.0                                 |
| 1         | 03/10/15              | 144                     | 4                    |                     |                            |                                     |                                  |                              |                                      |                                  |                             |                          |                        |               | 148 | 169                     | 1                    |                     |                           |                            |                                     |                                  |                              | 2                                    | 5                                | 4                           |                          |                        |               | 181  | 2/8   | 20.2                                 |
| 1         | 10/15/15              | 56                      | 20                   |                     |                            |                                     |                                  |                              |                                      |                                  |                             |                          |                        |               | 76  | 287                     | 10                   |                     | 1                         |                            |                                     |                                  |                              | 1                                    | 2                                | 1                           |                          |                        |               | 302  | 1/8   | 18.0                                 |
| 1         | 03/18/16              | 44                      |                      | 2                   |                            |                                     |                                  |                              |                                      |                                  |                             |                          |                        |               | 46  | 272                     |                      | 2                   | 3                         | 1                          | 1                                   | 1                                |                              |                                      | 6                                | 1                           |                          |                        |               | 287  | 1/8   | 23.8                                 |
| 2         | 08/15/11              |                         |                      |                     |                            |                                     |                                  |                              |                                      |                                  |                             |                          |                        |               | 0   |                         |                      |                     |                           |                            |                                     |                                  |                              |                                      | 0                                |                             |                          |                        |               | 0    | 8/8   | 21.4                                 |
| 2         | 10/14/11              |                         |                      |                     |                            |                                     |                                  |                              |                                      |                                  |                             |                          |                        |               | 0   |                         |                      |                     |                           |                            |                                     |                                  |                              |                                      | 0                                |                             |                          |                        |               | 0    | 8/8   | 37.8                                 |
| 2         | 12/14/11              |                         |                      |                     |                            |                                     |                                  |                              |                                      |                                  |                             |                          |                        |               | 0   |                         |                      |                     |                           |                            |                                     |                                  |                              |                                      | 0                                |                             |                          |                        |               | 0    | 8/8   | 15.5                                 |
| 2         | 03/09/12              |                         |                      |                     |                            |                                     |                                  |                              |                                      |                                  |                             |                          |                        |               | 0   |                         |                      |                     |                           |                            |                                     |                                  |                              |                                      | 0                                |                             |                          |                        |               | 0    | 8/8   | 31.4                                 |
| 2         | 06/19/12              |                         |                      |                     |                            |                                     |                                  |                              |                                      |                                  |                             |                          |                        |               | 0   |                         |                      |                     |                           |                            |                                     |                                  |                              |                                      | 0                                |                             |                          |                        |               | 0    | 8/8   | 26.5                                 |
| 2         | 07/24/12              | 4                       |                      |                     |                            |                                     |                                  |                              |                                      | 1                                |                             |                          |                        | 1             | 6   | 1                       |                      |                     |                           |                            |                                     |                                  |                              |                                      | 0                                |                             |                          |                        |               | 1    | 8/8   | 19.0                                 |
| 2         | 08/29/12              |                         |                      |                     |                            |                                     |                                  |                              |                                      |                                  |                             |                          |                        |               | 0   | 11                      |                      |                     |                           |                            |                                     |                                  |                              |                                      | 0                                |                             |                          |                        |               | 11   | 8/8   | 21.8                                 |
| 2         | 10/11/12              | 35                      |                      |                     |                            |                                     |                                  |                              |                                      |                                  |                             |                          |                        |               | 35  | 137                     |                      |                     |                           |                            | 1                                   |                                  |                              |                                      | 0                                |                             |                          | 1                      |               | 139  | 8/8   | 21.0                                 |
| 2         | 12/08/12              | 422                     |                      |                     | 1                          |                                     |                                  |                              |                                      | 3                                |                             |                          |                        | 1             | 427 | 27                      |                      |                     |                           | 2                          |                                     |                                  |                              | 2                                    | 2                                | 4                           |                          | 2                      |               | 39   | 8/8   | 17.0                                 |
| 2         | 02/27/13              | 99                      |                      |                     |                            |                                     |                                  |                              |                                      | 3                                |                             |                          |                        |               | 102 | 7                       |                      |                     |                           |                            |                                     |                                  |                              |                                      | 1                                |                             |                          |                        |               | 8    | 6/8   | 15.5                                 |
| 2         | 05/31/13              | 121                     |                      |                     |                            |                                     |                                  |                              |                                      | 10                               |                             |                          |                        |               | 131 | 67                      |                      |                     |                           |                            |                                     |                                  |                              |                                      | 4                                |                             |                          |                        |               | 71   | 1/8   | 32.0                                 |
| 2         | 09/24/13              | 28                      |                      |                     | 2                          |                                     |                                  |                              |                                      | 2                                |                             |                          |                        |               | 32  | 207                     |                      |                     |                           |                            |                                     |                                  |                              | 1                                    | 4                                | 1                           |                          |                        | 0             | 213  | 2/8   | 14.5                                 |

|   |          |     |  |  |    |     |    |   |    |    |    |   |   |   |     |     |  |  |  |    |     |    |   |    |    |    |   |    |    |     |      |      |
|---|----------|-----|--|--|----|-----|----|---|----|----|----|---|---|---|-----|-----|--|--|--|----|-----|----|---|----|----|----|---|----|----|-----|------|------|
| 2 | 03/12/14 | 220 |  |  |    |     | 1  |   |    | 4  |    |   |   |   | 225 | 207 |  |  |  |    |     | 2  |   |    | 9  |    |   | 1  |    | 219 | 1/8  | 30.5 |
| 2 | 09/04/14 |     |  |  |    |     |    |   |    |    |    |   |   |   | 0   | 92  |  |  |  |    |     |    |   | 0  |    |    |   |    | 92 | 1/8 | 26.5 |      |
| 2 | 03/10/15 | 63  |  |  |    | 23  | 2  | 1 |    |    |    |   |   |   | 89  | 42  |  |  |  |    | 90  | 2  |   |    | 2  | 13 |   | 2  | 3  | 154 | 1/64 | 29.0 |
| 2 | 10/15/15 | 17  |  |  |    |     |    |   |    |    |    |   |   |   | 17  | 113 |  |  |  | 2  | 13  | 21 | 1 | 5  | 13 | 5  | 1 | 3  |    | 177 | 3/8  | 14.6 |
| 2 | 03/18/16 | 354 |  |  | 6  | 5   | 16 |   | 4  | 5  | 4  |   |   | 2 | 396 | 397 |  |  |  | 18 | 20  | 11 | 3 | 23 | 23 | 38 |   | 4  | 1  | 538 | 1/8  | 23.0 |
| 3 | 08/16/11 |     |  |  |    |     |    |   |    |    |    |   |   |   | 0   |     |  |  |  |    |     |    |   | 0  | 1  |    |   |    | 1  | 8/8 | 24.2 |      |
| 3 | 10/14/11 |     |  |  |    |     |    |   |    |    |    |   |   |   | 0   |     |  |  |  |    |     |    |   | 0  |    |    |   |    | 0  | 8/8 | 19.5 |      |
| 3 | 11/07/11 |     |  |  |    |     |    |   |    |    |    |   |   |   | 0   | 1   |  |  |  |    |     |    |   | 0  |    |    |   |    | 1  | 8/8 | 25.0 |      |
| 3 | 03/09/12 |     |  |  |    |     |    |   |    |    |    |   |   |   | 0   |     |  |  |  |    |     |    |   | 0  |    |    | 1 |    | 1  | 8/8 | 18.2 |      |
| 3 | 07/24/12 |     |  |  |    |     |    |   |    |    |    |   |   |   | 0   |     |  |  |  |    |     |    |   | 0  |    |    |   |    | 0  | 8/8 | 18.2 |      |
| 3 | 10/11/12 |     |  |  |    |     |    |   |    |    |    |   |   |   | 0   |     |  |  |  | 1  |     |    | 1 | 0  |    |    |   |    | 2  | 8/8 | 15.0 |      |
| 3 | 12/08/12 |     |  |  |    |     |    |   |    | 2  |    |   |   |   | 2   |     |  |  |  |    |     |    |   |    | 12 |    |   |    | 12 | 8/8 | 13.5 |      |
| 3 | 02/27/13 |     |  |  | 2  | 2   |    |   | 8  | 2  |    |   |   |   | 14  | 1   |  |  |  | 3  |     |    |   | 7  | 5  |    |   | 2  |    | 18  | 8/8  | 17.5 |
| 3 | 05/31/13 | 2   |  |  |    |     |    |   |    |    |    |   |   |   | 2   |     |  |  |  | 1  |     |    |   |    | 6  |    |   |    | 7  | 8/8 | 18.5 |      |
| 3 | 09/24/13 | 9   |  |  | 10 | 32  |    |   | 3  | 4  | 1  |   | 4 |   | 63  | 8   |  |  |  | 14 | 88  | 2  |   | 91 | 24 | 6  |   | 39 | 0  | 272 | 1/8  | 18.5 |
| 3 | 03/12/14 | 24  |  |  | 5  | 245 | 1  |   | 11 | 49 | 2  |   | 7 |   | 344 | 15  |  |  |  | 4  | 89  | 1  |   | 19 | 58 | 6  |   | 29 |    | 221 | 1/8  | 22.5 |
| 3 | 09/04/14 | 73  |  |  | 4  | 5   | 6  | 1 | 8  | 18 |    | 2 | 3 |   | 120 | 26  |  |  |  | 5  | 16  | 2  |   | 26 | 51 |    | 1 | 8  |    | 135 | 1/8  | 31.5 |
| 3 | 03/10/15 | 70  |  |  | 1  | 27  | 11 |   |    | 8  | 44 |   | 6 |   | 167 | 38  |  |  |  | 1  | 18  | 3  |   |    | 5  | 36 |   | 2  |    | 103 | 2/8  | 19.2 |
| 3 | 10/15/15 | 25  |  |  | 10 | 55  | 8  |   | 7  | 2  | 2  |   | 2 |   | 111 | 54  |  |  |  | 5  | 100 | 22 |   | 18 | 17 | 8  | 9 | 22 | 1  | 256 | 1/8  | 17.6 |
| 3 | 03/18/16 | 37  |  |  | 10 | 46  | 36 |   | 1  | 8  | 6  |   | 3 | 1 | 148 | 35  |  |  |  | 73 | 53  | 39 | 5 | 13 | 30 | 15 |   | 16 |    | 279 | 2/8  | 21.0 |

Table DR3. Raw diatom counts and diatom concentrations (spreadsheet).

2017167\_Table DR3.xlsx

Table DR4. Diatom results summary (spreadsheet).

2017167\_Table DR4.xlsx

**Table DR5: List of diatom taxa and ecological classifications.**

| Diatom taxa                    | Taxonomic authority                    | Ecological information (life form and preferred environment)                                                                                       | Classification in this paper |
|--------------------------------|----------------------------------------|----------------------------------------------------------------------------------------------------------------------------------------------------|------------------------------|
| <i>Achnanthes brevipes</i>     | Agardh 1824                            | Epiphyte, tidal flat (1); Tidal flat (2); Tidal flat (3); Low marsh/tidal flat (5); Tidal flat (6); Low marsh/tidal flat (7)                       | Tidal flat                   |
| <i>Actinocyclus normanii</i>   | (Gregory) Hustedt, 1957                | Planktonic, subtidal (1)                                                                                                                           | Planktonic                   |
| <i>Actinocyclus ochotensis</i> | A.P. Jousé, 1969                       | Planktonic, subtidal (1)                                                                                                                           | Tidal flat                   |
| <i>Actinoptychus senarius</i>  | (Ehrenberg) Ehrenberg, 1843            | Tychoplanktonic, subtidal (1); Tidal flat (2); Tidal flat (6)                                                                                      | Planktonic                   |
| <i>Bacillaria paradoxa</i>     | J.F.Gmelin, 1791                       | Epiphyte, tidal channel or low marsh (1); Tidal flat (4); Low marsh (5); Tidal flat (6); Low marsh/tidal flat (7)                                  | Tidal flat                   |
| <i>Caloneis bacillum</i>       | (Grunow) Cleve, 1894                   | Epipellic, high marsh (1); High marsh and low marsh (2); High marsh and low marsh (3); High marsh (5); Low marsh (6); High marsh and low marsh (7) | High marsh                   |
| <i>Caloneis westii</i>         | (W. Smith) Hendey, 1964                | Epipellic, low marsh and tidal flats (1); Low marsh and tidal flats (2); Low marsh (3); Low marsh (4); Low marsh (6)                               | Low marsh                    |
| <i>Cavinula lapidosa</i>       | (Krasske) Lange-Bertalot, 1996         | High marsh (6)                                                                                                                                     | High marsh                   |
| <i>Cocconeis scutellum</i>     | Ehrenberg, 1838                        | Epiphyte, tidal flat (1); Tidal flat (2); Tidal flat (3); Tidal flat (4); Tidal flat and low marsh (5); Tidal flat (6); Tidal flat (7)             | Tidal flat                   |
| <i>Cosmioneis pusilla</i>      | (W.Smith) D.G.Mann & A.J.Stickle, 1990 | Epipellic, high marsh (1); High marsh (2); High marsh (3); High marsh (4); High marsh and low marsh (5); High marsh (6); High marsh (7)            | High marsh                   |
| <i>Delphineis kippae</i>       | Sancetta                               | Epipsammic, epiphyte, tidal flat (8)                                                                                                               | Tidal flat                   |
| <i>Delphineis surirella</i>    | (Ehrenberg) G.W.Andrews, 1981          | Epipsammic, epiphyte, tidal flat (1); Tidal flat (2); Tidal flat (4); Tidal flat (6)                                                               | Tidal flat                   |
| <i>Denticula subtilis</i>      | Grunow, 1862                           | Epipellic, high marsh (1); High marsh (2); High marsh (3); High marsh (4); High marsh (6); High marsh (7)                                          | High marsh                   |



|                                               |                                 |                                                                                                                                                                        |                       |
|-----------------------------------------------|---------------------------------|------------------------------------------------------------------------------------------------------------------------------------------------------------------------|-----------------------|
| <i>Diploneis ovalis</i>                       | (Hilse) Cleve, 1891             | High marsh (6)                                                                                                                                                         | High marsh            |
| <i>Diploneis pseudovalis</i>                  | Hustedt, 1930                   | Epipellic, high marsh (1); high marsh and low marsh (2); High marsh (3); High marsh and low marsh (4); High marsh (6)                                                  | High marsh            |
| <i>Diploneis smithii</i> var. <i>rhombica</i> | Cleve-Euler, 1915               | Epipellic, tidal flat (1); Low marsh (6); Low marsh (7)                                                                                                                | Low marsh             |
| <i>Eunotia pectinales</i>                     | Ehrenberg 1837                  | Epiphyte, high marsh/upland (1); Upland (6)                                                                                                                            | Freshwater/High marsh |
| <i>Fallacia forcipata</i>                     | (Greville) Stickle & Mann, 1990 | Tidal flat or channel (6); Low marsh and tidal flat (7);                                                                                                               | Low marsh             |
| <i>Frustulia vulgaris</i>                     | (Thwaites) De Toni, 1891        | Epipellic, high marsh (1); High marsh and low marsh (2); High marsh and low marsh (3); High marsh (4); High marsh (6); High marsh (7)                                  | High marsh            |
| <i>Gomphonema parvulum</i>                    | (Kützing) Kützing, 1849         | High marsh or freshwater (1); Freshwater (6)                                                                                                                           | Freshwater/High marsh |
| <i>Gyrosigma acuminatum</i>                   | (Kützing) Rabenhorst, 1853      | Tidal flat (4); Low marsh (6)                                                                                                                                          | Low marsh             |
| <i>Gyrosigma eximium</i>                      | (Thwaites) Boyer, 1927          | Epipellic, low marsh (1); Low marsh (2); Low marsh (3) Low marsh (4); Low marsh (5); Low marsh (6); Low marsh (7)                                                      | Low marsh             |
| <i>Hyalodiscus scoticus</i>                   | (Kützing) Grunow, 1879          | Epiphyte, tidal flat (1); Tidal flat or channel (2); Tidal flat (3); Low marsh or tidal flat (5); Tidal flat or channel (6)                                            | Tidal flat            |
| <i>Luticola mutica</i>                        | (Kützing) D.G.Mann, 1990        | Epiphyte, high marsh (1); High marsh and low marsh (2); High marsh and low marsh (4); High marsh and low marsh (6); High marsh (7)                                     |                       |
| <i>Mastogloia exigua</i>                      | F.W.Lewis                       | Epipellic, low marsh (1); Low marsh and tidal flats and channels (2); Low marsh (3); Low marsh (4); Low marsh (6); Low marsh (7)                                       | Low marsh             |
| <i>Melosira moniliformis</i>                  | (O.F.Müller) C.Agardh, 1824     | Epipellic, epiphyte, tidal flat and low marsh (1); Tidal flat or channel (2); Tidal flat or channel (3); Tidal flat (4) Tidal flat (6); Tidal flat (7)                 | Tidal flat            |
| <i>Melosira nummuloides</i>                   | C.Agardh, 1824                  | Epipellic, epiphyte, tidal flat and low marsh (1); Tidal flat or channel (2); Tidal flat or channel (3); Tidal flat (4); Low marsh (5); Tidal flat (6); Tidal flat (7) | Tidal flat            |

|                                 |                                          |                                                                                                                                                                                 |                       |
|---------------------------------|------------------------------------------|---------------------------------------------------------------------------------------------------------------------------------------------------------------------------------|-----------------------|
| <i>Navicula cincta</i>          | (Ehrenberg) Ralfs,<br>1861               | Epipellic, high marsh and low marsh (1); High marsh and low marsh (2); High marsh and low marsh (3); High marsh and low marsh (4); High marsh (6); High marsh and low marsh (7) | High marsh            |
| <i>Navicula gregaria</i>        | Donkin, 1861                             | Epipellic, low marsh and high marsh (1); Low marsh (4); Low marsh (7)                                                                                                           | Low marsh             |
| <i>Navicula peregrina</i>       | (Ehrenberg) Kützing,<br>1844             | Low marsh (5); Low marsh (6); Low marsh (7)                                                                                                                                     | Low marsh             |
| <i>Navicula salinarium</i>      | Grunow, 1880                             | Epipellic, low marsh (1); High marsh and low marsh (5); Low marsh (7)                                                                                                           | Low marsh             |
| <i>Navicula tripunctata</i>     | (O.F.Müller) Bory de Saint-Vincent, 1822 | Epipellic, high marsh (2)                                                                                                                                                       | High marsh            |
| <i>Nitzschia brevissima</i>     | Grunow, 1880                             | Epipellic, high marsh (1); High marsh (3); High marsh (4); High marsh (7)                                                                                                       | High marsh            |
| <i>Nitzschia commutata</i>      | Grunow, 1880                             | Epipellic, high marsh (1); High marsh (2) High marsh and low marsh (3) High marsh and low marsh (4); High marsh (6)                                                             | High marsh            |
| <i>Nitzschia dubia</i>          | W.Smith, 1853                            | Low marsh (6)                                                                                                                                                                   | Low marsh             |
| <i>Nitzschia scapelliformis</i> | (Grunow) Grunow,<br>1880                 | Epipellic, low marsh (1); Low marsh (2); Low marsh (3); Low marsh (4) Low marsh (7)                                                                                             | Low marsh             |
| <i>Nitzschia sigma</i>          | (Kützing) W.Smith,<br>1853               | Epipellic, tidal flat and low marsh (1); Tidal flat or channel (2); Tidal flat or channel (3); Tidal flat (4); Tidal flat (6); Low marsh (7)                                    | Tidal flat            |
| <i>Odontella aurita</i>         | (Lyngbye) C.Agardh,<br>1832              | Planktonic, tidal flat (1); Tidal flat (2); Tidal flat (4); Planktonic or tycho planktonic (6)                                                                                  | Tidal flat            |
| <i>Opephora marina</i>          | (Gregory) Petit, 1888                    | Epipsammic, tidal flat (1); Tidal flat or channel (3); Low marsh and tidal flat (5); Tidal flat or channel (6)                                                                  | Tidal flat            |
| <i>Petroneis marina</i>         | (Kütz.) D.G. Mann,<br>1999               | Epipellic, tidal flat (1); Tidal flat (4)                                                                                                                                       | Tidal flat            |
| <i>Pinnularia intermedia</i>    | (Lagerstedt) Cleve,<br>1895              | Aerophilic, freshwater or high marsh (8)                                                                                                                                        | Freshwater/High marsh |
| <i>Pinnularia lagerstedtii</i>  | (Cleve) Cleve-Euler,<br>1934             | Aerophilic, high marsh (2); High marsh (4); High marsh (3); Freshwater or high marsh (5); High marsh (6)                                                                        | High marsh            |

|                                 |                                            |                                                                                                                                                                                        |                       |
|---------------------------------|--------------------------------------------|----------------------------------------------------------------------------------------------------------------------------------------------------------------------------------------|-----------------------|
| <i>Pinnularia microstauron</i>  | (Ehrenberg) Cleve, 1891                    | Aerophilic, freshwater or high marsh (5);<br>Freshwater or high marsh (6)                                                                                                              | Freshwater/High marsh |
| <i>Pinnularia viridis</i>       | (Nitzsch) Ehrenberg, 1843                  | Aerophilic, freshwater or high marsh (6)                                                                                                                                               | Freshwater/High marsh |
| <i>Planothidium delicatulum</i> | (Kützing) Round & Bukhtiyarova, 1996       | Epipsammic, tidal flat (1); Tidal flat or channel (2); Tidal flat or channel (3); Tidal flat (4); Low marsh and tidal flat (5); Tidal flat or channel (6); Tidal flat or low marsh (7) | Tidal flat            |
| <i>Planothidium lanceolatum</i> | (Brébisson ex Kützing) Lange-Bertalot 1999 | Epipsammic, epiphyte, low marsh (1); Tidal flat (2); Low marsh (6); Low marsh (7)                                                                                                      | Low marsh             |
| <i>Rhaphoneis psammicola</i>    | R.Z.Riznyk                                 | Epipsammic, tidal flat (1); Tidal flat or channel (2); Tidal flat (4); Tidal flat or channel (6)                                                                                       | Tidal flat            |
| <i>Rhopalodia musculus</i>      | (Kützing) Otto Müller, 1900                | Epiphyte, epipelic, low marsh (1); Low marsh (2); Low marsh (3); Low marsh (4); Low marsh (5)                                                                                          | Low marsh             |
| <i>Stauroneis anceps</i>        | Ehrenberg, 1843                            | Epipelic, high marsh (1); High marsh (2)                                                                                                                                               |                       |
| <i>Surirella brebissonii</i>    | Krammer & Lange-Bertalot, 1987             | Epipelic, low marsh (1); Low marsh (5)                                                                                                                                                 | Low marsh             |
| <i>Surirella ovalis</i>         | Brébisson, 1838                            | Low marsh (7)                                                                                                                                                                          | Low marsh             |
| <i>Tabularia fasciculata</i>    | (C.Agardh) D.M.Williams & Round, 1986      | Epiphyte, tidal flat (1); Tidal flat or channel (2); Tidal flat or channel (3); Tidal flat (4); Tidal flat or channel (6); Tidal flat and low marsh (7)                                | Tidal flat            |
| <i>Thalassiosira antiqua</i>    | (Grunow) Cleve                             | Planktonic or tychoplanktonic, tidal flat (6)                                                                                                                                          | Tidal flat            |
| <i>Thalassiosira pacifica</i>   | Gran & Angst, 1931                         | Planktonic or tychoplanktonic, tidal flat (6)                                                                                                                                          | Tidal flat            |
| <i>Tryblionella debilis</i>     | Arnott ex O'Meara, 1873                    | Epipelic, low marsh (1); Low marsh and high marsh (2); Low marsh and high marsh (3); Low marsh (4); Low marsh (6); Low marsh (7)                                                       | Low marsh             |
| <i>Tryblionella granulata</i>   | (Grunow) D.G.Mann, 1990                    | Epipelic, tidal flat (1); Tidal flat or channel (2); Tidal flat or channel (3); Tidal flat (4); Tidal flat or channel (6)                                                              | Tidal flat            |
| <i>Tryblionella levidensis</i>  | W.Smith, 1856                              | Epipelic, tidal flat (1); Tidal flat or channel (3); Tidal flat (4); Tidal flat or channel (6); Tidal flat (7)                                                                         | Tidal flat            |

(1) Hemphill-Haley, E., 1993, Taxonomy of recent and fossil (Holocene) diatoms (Bacillariophyta) from northern Willapa Bay, Washington: U.S. Geological Survey open report 93-289, 151 p.

- (2) Hemphill-Haley, E., 1995a, Intertidal diatoms from Willapa Bay, Washington: applications to studies of small-scale sea-level changes: Northwest Science , v. 69, p. 29–45.
- (3) Hemphill-Haley, E., 1995b, Diatom evidence for earthquake-induced subsidence and tsunami 300 years ago in southern coastal Washington: Geological Society of America Bulletin, v. 107,p. 367–378.
- (4) Atwater B.F., Hemphill-Haley E., 1997, Recurrence intervals for great earthquakes of the past 3,500 years at northeastern Willapa Bay, Washington: U.S. Geol. Surv. Prof. Pap. 1576:108 p
- (5) Sherrod B.L., 1999, Gradient analysis of diatom assemblages in a Puget Sound salt marsh: can such assemblages be used for quantitative paleoecological reconstruction? Palaeogeography, Palaeoclimatology, Palaeoecology, v. 149, p. 213-226.
- (6) Witter, R.C., Hemphill-Haley, E., Hart, R., and Gay, L., 2009, Tracking prehistoric Cascadia tsunami deposits at Nestucca Bay, Oregon: U.S. Geological Survey, National Earthquake Hazards Reduction Program Final Technical Report 08HQGR0076 92, 34 p.
- (7) Sawai, Y., Horton, B.P., Kemp, A.C., Hawkes, A.D., Nagumo, T. and Nelson, A.R., 2016, Relationships between diatoms and tidal environments in Oregon and Washington, USA: Diatom Research, v. 31, p.17-38.
- (8) Denys, L., 1991, A Check-list of the diatoms in the Holocene deposits of the western Belgian coastal plain with a survey of their apparent ecological requirements. Ministère des affaires économiques, Service Géologique de Belgique.

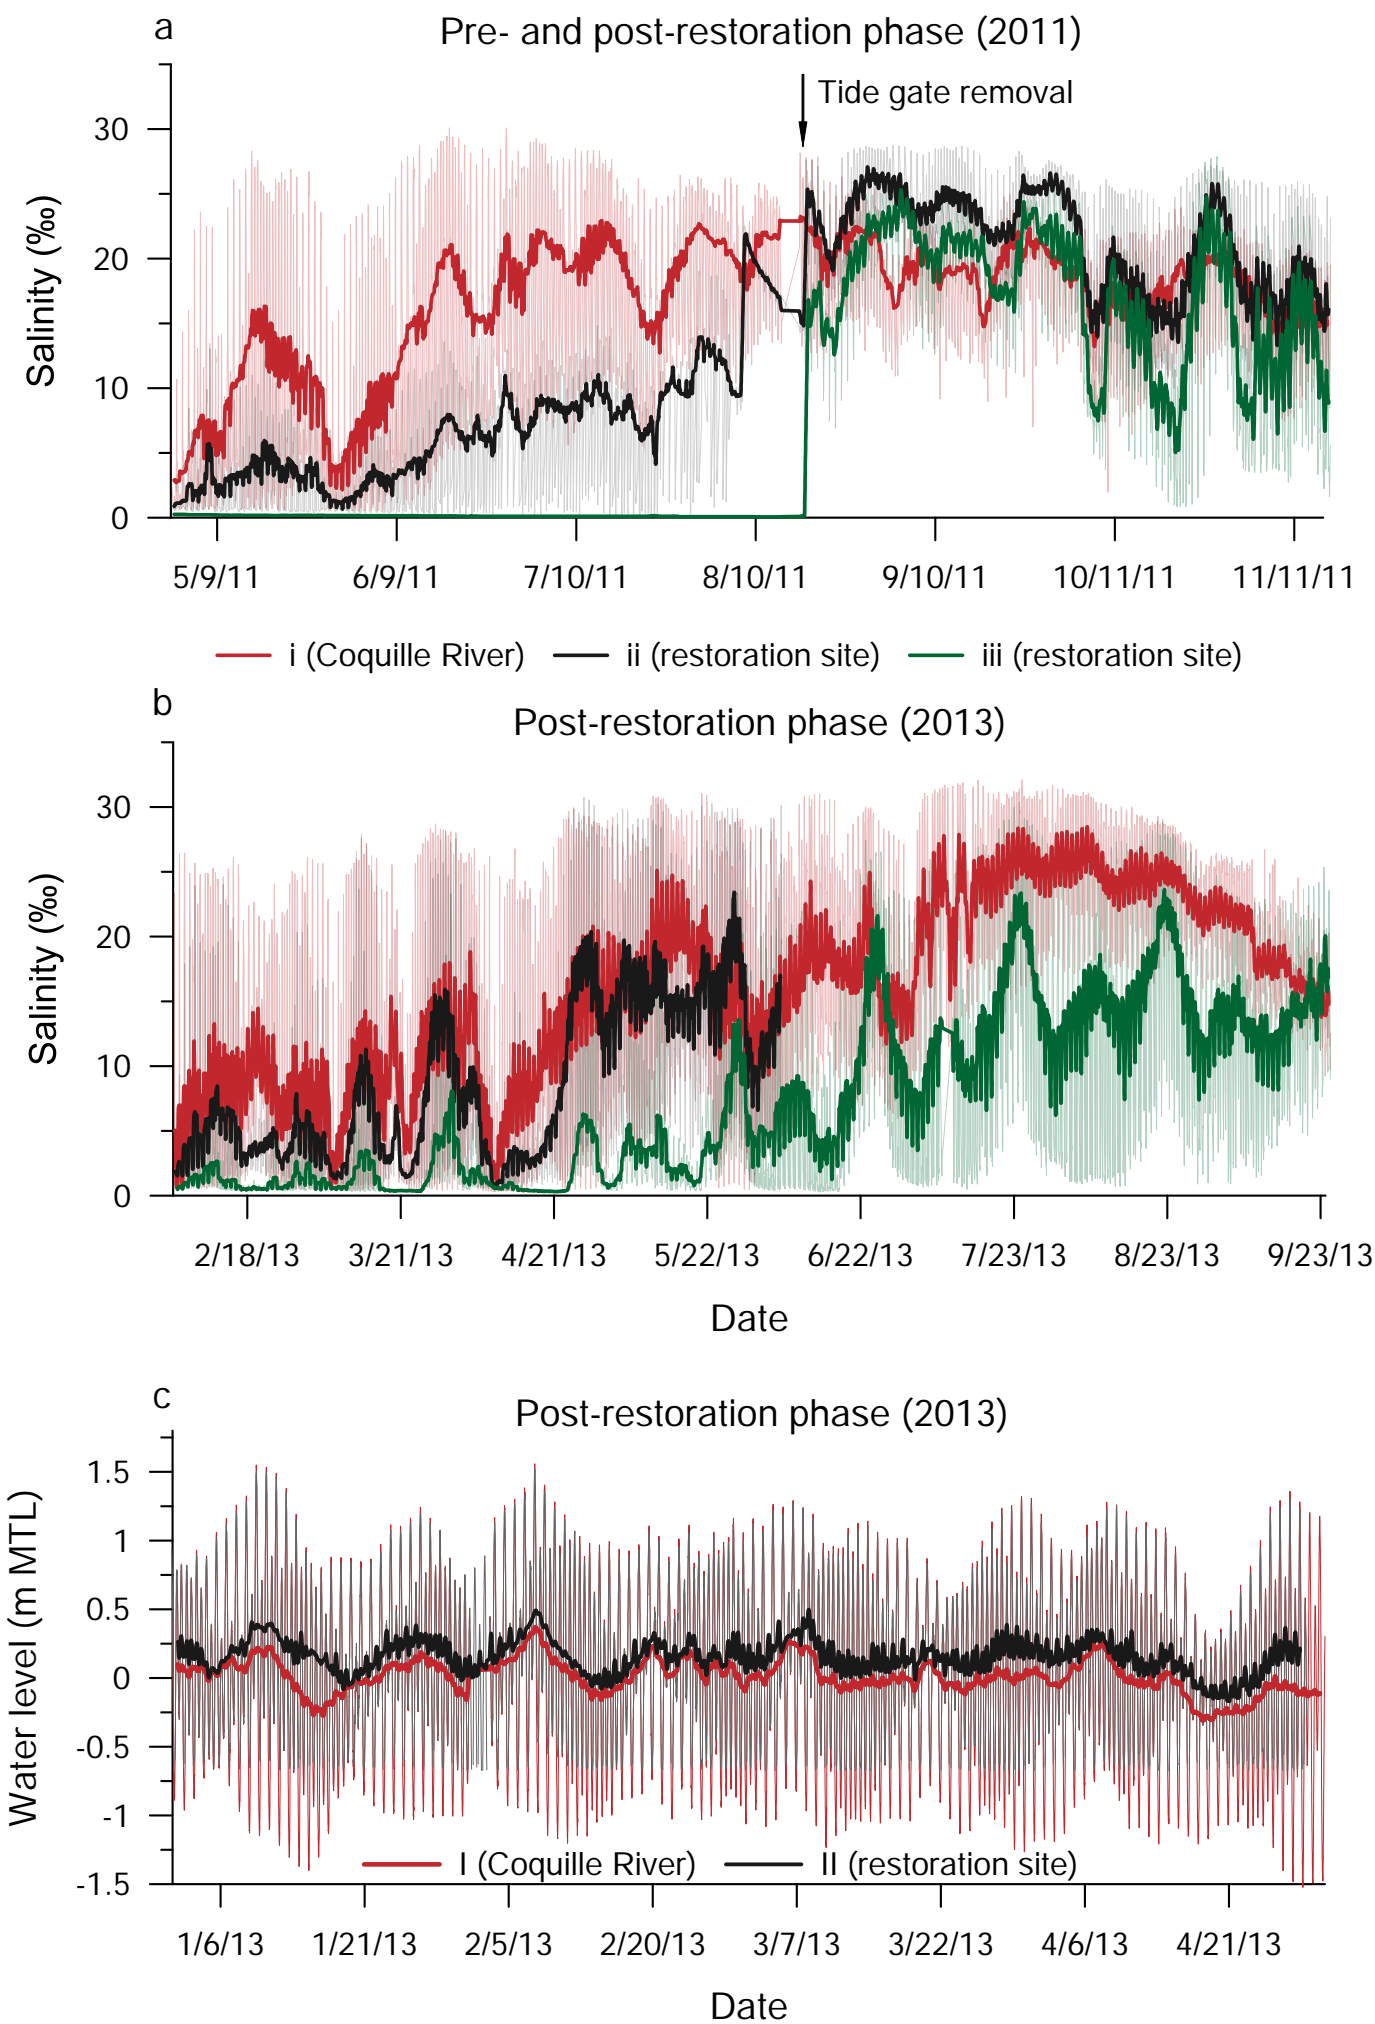

Figure DR1

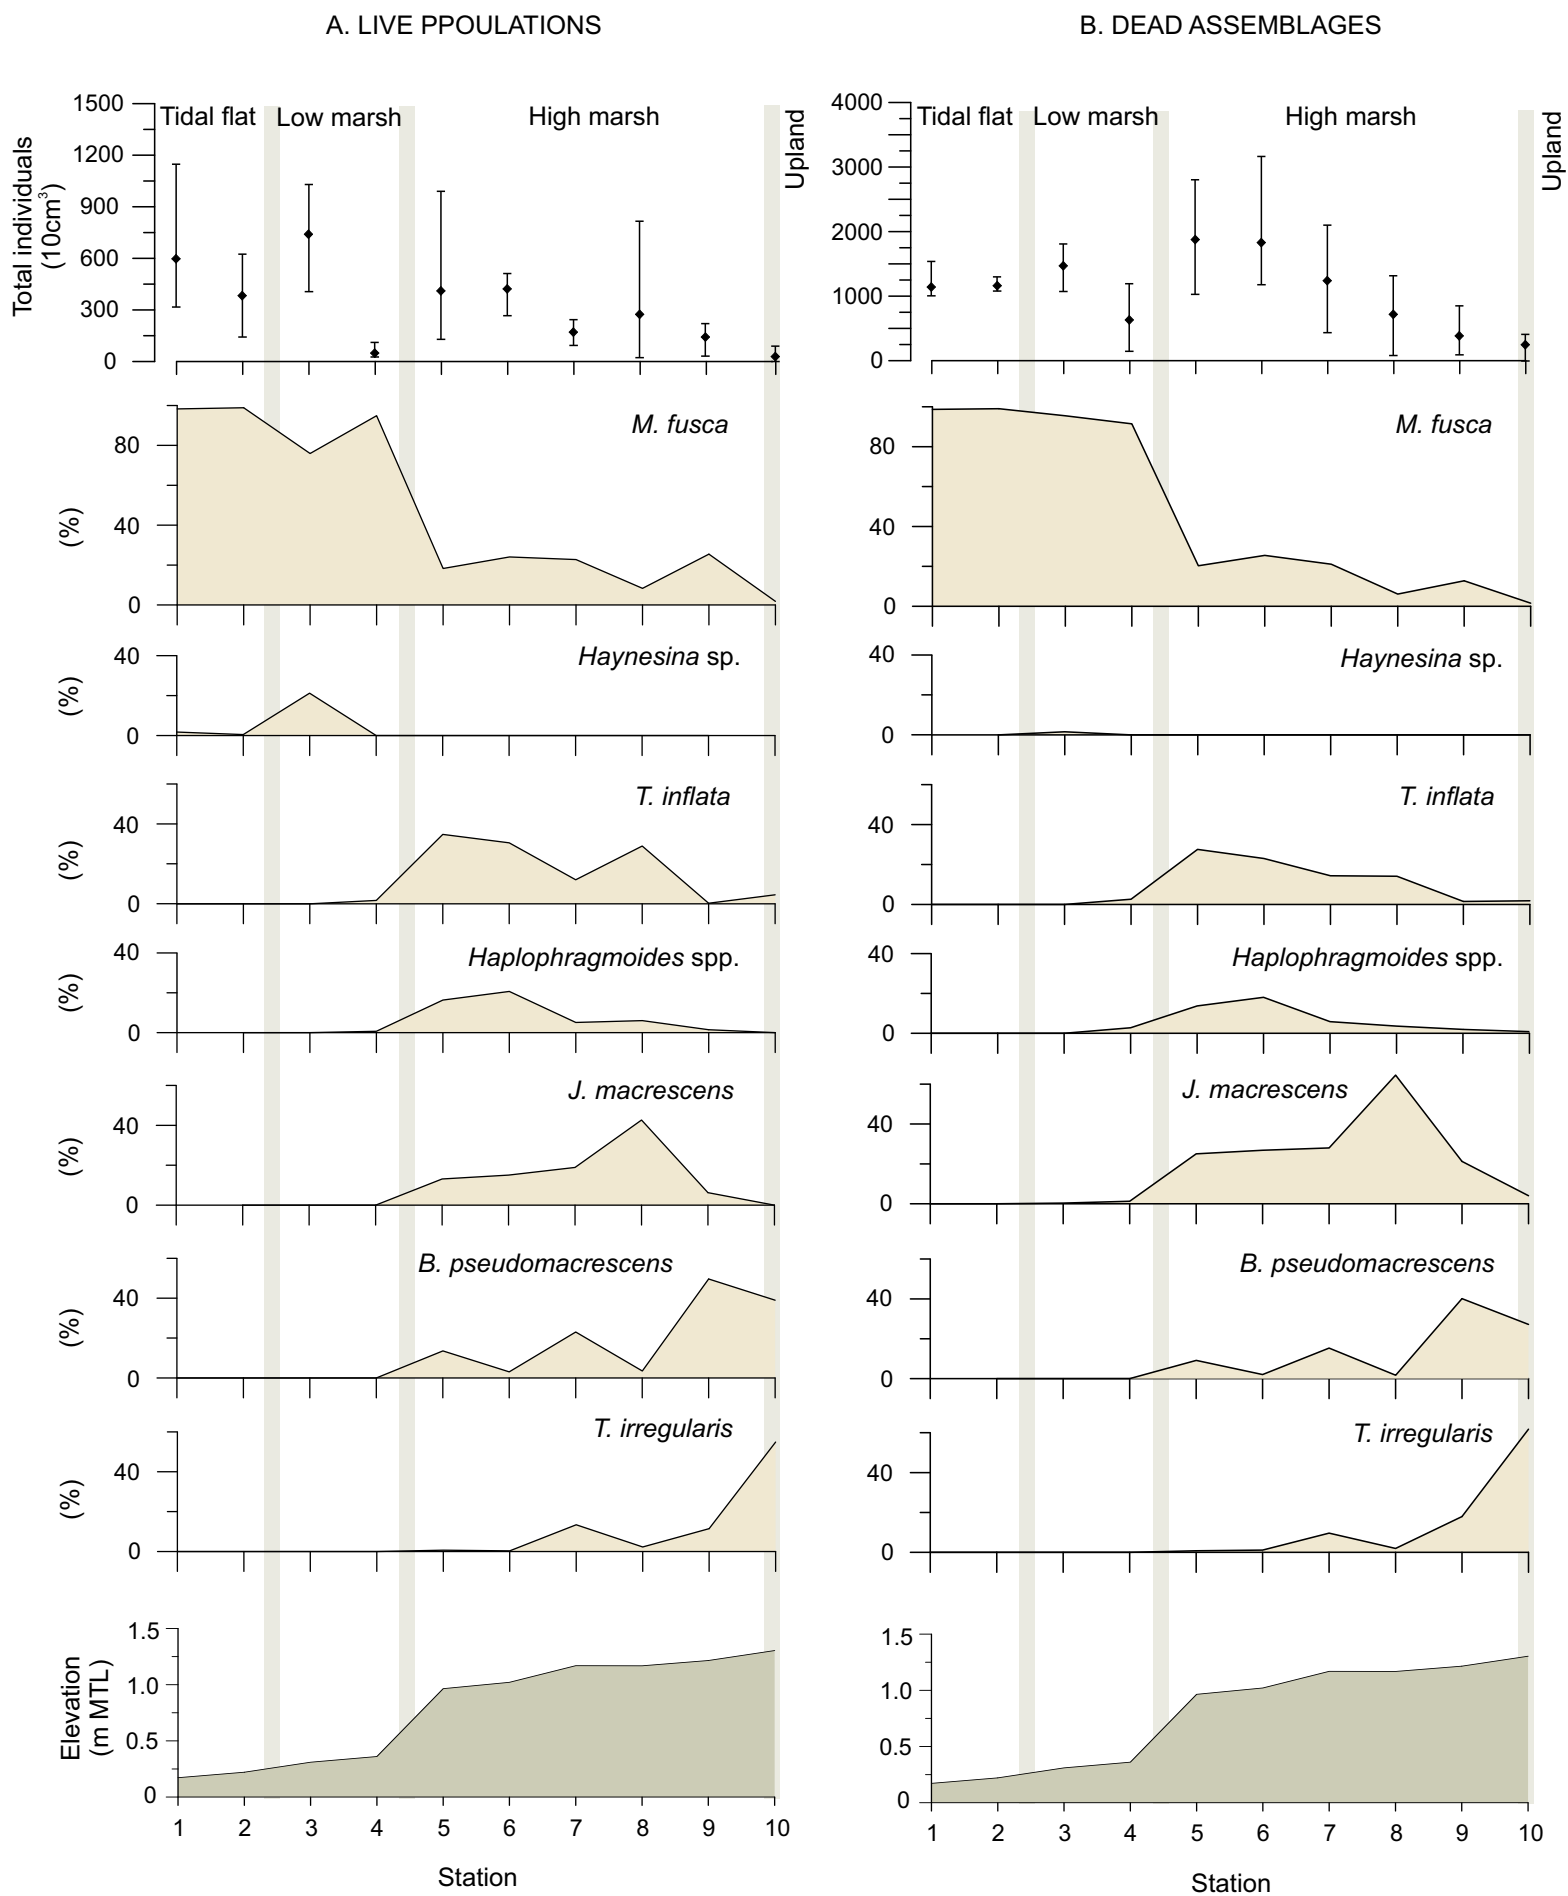

Figure DR2

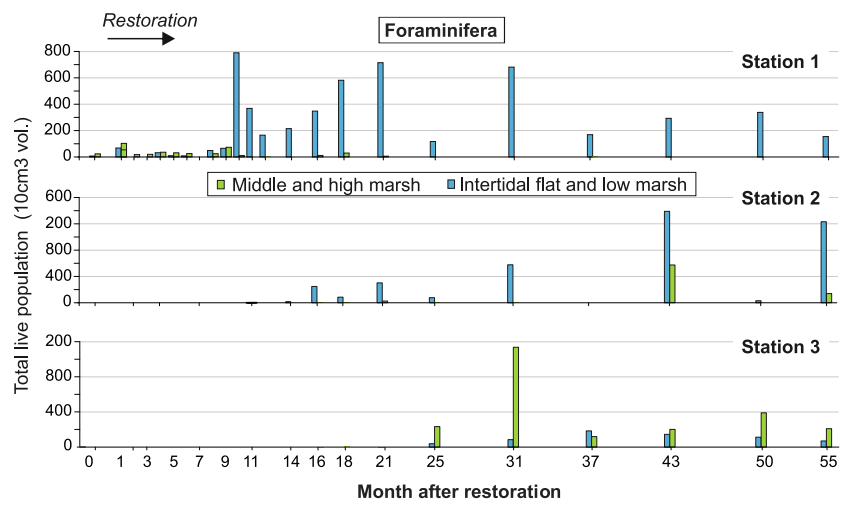

Figure DR3
